# Supplementary material for: Epigenetic down-regulation of the HIST1 locus predicts better prognosis in acute myeloid leukemia with NPM1 mutation
Source: Clin Epigenetics. 2019 Oct 12;11:141. doi: 10.1186/s13148-019-0738-6 (PMC6790061; doi:10.1186/s13148-019-0738-6)
Supplement: Supplementary file 4 — Table S5. GES 81 g, LAM HIST1 16 ‘high (1)’ vs. 11 ‘low (0)’ [file 13148_2019_738_MOESM4_ESM.xlsx]

## Sheet: Feuil1
Table S5
GES 81g, LAM HIST1 16 '1' vs. 11 '0'
(p<5% & |FC| > 1.5x)
Gene Symbol	Title	Cytoband	Entrez Gene ID	Average HIST1_0	Average HIST1_1	FC (log2) HIST1_1vs.0	t	p.value	q.value	Associated
S100A12	S100 calcium binding protein A12	1q21	6283	7.30957	9.41448	2.10491	2.27714	0.0308383	0.999994	up HIST1 1 vs. 0
S100A8	S100 calcium binding protein A8	1q21	6279	10.3406	12.2852	1.94469	2.584	0.0154385	0.999994	up HIST1 1 vs. 0
SERPINA1	serpin peptidase inhibitor, clade A (alpha-1 antiproteinase, antitrypsin), member 1	14q32.1	5265	6.7353	8.6748	1.9395	2.44772	0.0210937	0.999994	up HIST1 1 vs. 0
S100A9	S100 calcium binding protein A9	1q21	6280	9.65137	11.5811	1.92969	2.20934	0.0357349	0.999994	up HIST1 1 vs. 0
PPBP	pro-platelet basic protein (chemokine (C-X-C motif) ligand 7)	4q12-q13	5473	8.26365	10.152	1.88834	2.52745	0.0175889	0.999994	up HIST1 1 vs. 0
LGALS2	lectin, galactoside-binding, soluble, 2	22q13.1	3957	6.34396	8.22215	1.87818	2.38194	0.0244569	0.999994	up HIST1 1 vs. 0
FCN1	ficolin (collagen/fibrinogen domain containing) 1	9q34	2219	8.08908	9.95616	1.86709	2.21393	0.0353831	0.999994	up HIST1 1 vs. 0
CYBB	cytochrome b-245, beta polypeptide	Xp21.1	1536	8.73123	10.478	1.74681	2.16934	0.0389423	0.999994	up HIST1 1 vs. 0
TUBB1	tubulin, beta 1 class VI	20q13.32	81027	5.47437	7.10127	1.6269	2.77539	0.00984223	0.999994	up HIST1 1 vs. 0
NCR2	natural cytotoxicity triggering receptor 2	6p21.1	9436	4.02173	5.52015	1.49842	2.38038	0.0245422	0.999994	up HIST1 1 vs. 0
ALOX5	arachidonate 5-lipoxygenase	10q11.2	240	8.35298	9.84124	1.48826	2.68226	0.012273	0.999994	up HIST1 1 vs. 0
CLEC4A	C-type lectin domain family 4, member A	12p13	50856	5.8343	7.30876	1.47446	2.24442	0.0331204	0.999994	up HIST1 1 vs. 0
SULF2	sulfatase 2	20q12-q13.2	55959	7.27637	8.736	1.45963	2.18792	0.0374217	0.999994	up HIST1 1 vs. 0
IL10RA	interleukin 10 receptor, alpha	11q23	3587	8.34668	9.69363	1.34696	2.25567	0.0323189	0.999994	up HIST1 1 vs. 0
MPP7	membrane protein, palmitoylated 7 (MAGUK p55 subfamily member 7)	10p12.1	143098	7.25252	8.5448	1.29228	2.29721	0.0295103	0.999994	up HIST1 1 vs. 0
TNFSF10	tumor necrosis factor (ligand) superfamily, member 10	3q26	8743	8.0161	9.27147	1.25536	2.37989	0.0245689	0.999994	up HIST1 1 vs. 0
PF4	platelet factor 4	4q12-q21	5196	7.0312	8.22481	1.19361	2.50925	0.0183378	0.999994	up HIST1 1 vs. 0
ITGA2B	integrin, alpha 2b (platelet glycoprotein IIb of IIb/IIIa complex, antigen CD41)	17q21.32	3674	5.41846	6.51017	1.09171	2.362	0.0255694	0.999994	up HIST1 1 vs. 0
IL6ST	interleukin 6 signal transducer (gp130, oncostatin M receptor)	5q11.2	3572	7.65518	8.72383	1.06865	2.08122	0.0469331	0.999994	up HIST1 1 vs. 0
WHAMMP3	WAS protein homolog associated with actin, golgi membranes and microtubules pseudogene 3	15q11.2	339005	5.75129	6.79365	1.04236	2.62985	0.0138772	0.999994	up HIST1 1 vs. 0
CLU	clusterin	8p21-p12	1191	7.30281	8.33906	1.03625	2.15268	0.0403527	0.999994	up HIST1 1 vs. 0
JAZF1	JAZF zinc finger 1	7p15.2-p15.1	221895	6.32561	7.3543	1.02869	2.10467	0.044676	0.999994	up HIST1 1 vs. 0
PLA2G7	phospholipase A2, group VII (platelet-activating factor acetylhydrolase, plasma)	6p21.2-p12	7941	4.24202	5.26854	1.02652	2.05715	0.0493556	0.999994	up HIST1 1 vs. 0
ODF3B	outer dense fiber of sperm tails 3B	22q13.33	440836	7.5145	8.50626	0.991756	2.18644	0.0375411	0.999994	up HIST1 1 vs. 0
SLC2A6	solute carrier family 2 (facilitated glucose transporter), member 6	9q34	11182	6.82947	7.7999	0.97043	2.46015	0.0205081	0.999994	up HIST1 1 vs. 0
CD48	CD48 molecule	1q21.3-q22	962	8.2148	9.1155	0.900701	2.06028	0.0490345	0.999994	up HIST1 1 vs. 0
TNFAIP2	tumor necrosis factor, alpha-induced protein 2	14q32	7127	8.82205	9.71215	0.890102	2.29955	0.0293589	0.999994	up HIST1 1 vs. 0
ABCC6	ATP-binding cassette, sub-family C (CFTR/MRP), member 6	16p13.1	368	5.70795	6.56356	0.855618	2.75712	0.0102802	0.999994	up HIST1 1 vs. 0
NLRP1	NLR family, pyrin domain containing 1	17p13.2	22861	8.02403	8.86889	0.844855	2.18683	0.0375093	0.999994	up HIST1 1 vs. 0
ADAM8	ADAM metallopeptidase domain 8	10q26.3	101	7.79577	8.62534	0.82957	2.14118	0.0413524	0.999994	up HIST1 1 vs. 0
LGALSL	lectin, galactoside-binding-like	2p14	29094	5.10575	5.9309	0.825157	2.07926	0.047127	0.999994	up HIST1 1 vs. 0
GNLY	granulysin	2p11.2	10578	7.17817	8.00227	0.824095	2.24249	0.0332596	0.999994	up HIST1 1 vs. 0
ANXA3	annexin A3	4q21.21	306	3.56262	4.38531	0.822692	2.49872	0.0187846	0.999994	up HIST1 1 vs. 0
CHST13	carbohydrate (chondroitin 4) sulfotransferase 13	3q21.3	166012	6.59461	7.39069	0.79608	2.32773	0.02759	0.999994	up HIST1 1 vs. 0
CALD1	caldesmon 1	7q33	800	3.51073	4.29738	0.786651	2.43917	0.0215056	0.999994	up HIST1 1 vs. 0
LAT	linker for activation of T cells	16p11.2	27040	7.34976	8.13277	0.783015	2.27298	0.0311207	0.999994	up HIST1 1 vs. 0
NFKB2	nuclear factor of kappa light polypeptide gene enhancer in B-cells 2 (p49/p100)	10q24	4791	6.97926	7.75668	0.777419	2.63871	0.0135929	0.999994	up HIST1 1 vs. 0
KIF13A	kinesin family member 13A	6p23	63971	7.03881	7.81057	0.771755	2.19927	0.0365194	0.999994	up HIST1 1 vs. 0
CLEC2D	C-type lectin domain family 2, member D	12p13	29121	5.23239	6.0011	0.768714	2.07127	0.0479214	0.999994	up HIST1 1 vs. 0
ENC1	ectodermal-neural cortex 1 (with BTB-like domain)	5q13	8507	6.55199	7.30676	0.75477	2.07589	0.0474603	0.999994	up HIST1 1 vs. 0
CD8A	CD8a molecule	2p12	925	6.1575	6.9094	0.751903	2.14133	0.0413394	0.999994	up HIST1 1 vs. 0
ZBP1	Z-DNA binding protein 1	20q13.31	81030	5.05289	5.78979	0.736903	2.46783	0.0201536	0.999994	up HIST1 1 vs. 0
ITGB3	integrin, beta 3 (platelet glycoprotein IIIa, antigen CD61)	17q21.32	3690	5.89036	6.58751	0.697144	2.23077	0.0341167	0.999994	up HIST1 1 vs. 0
IGHD	immunoglobulin heavy constant delta	14q32.33	3495	5.25177	5.93546	0.683698	2.1375	0.0416769	0.999994	up HIST1 1 vs. 0
LOC401320	uncharacterized LOC401320	7p15.1	401320	7.56974	8.23652	0.66678	2.11993	0.0432592	0.999994	up HIST1 1 vs. 0
SLC44A2	solute carrier family 44, member 2	19p13.1	57153	6.19905	6.84775	0.648705	2.28232	0.0304903	0.999994	up HIST1 1 vs. 0
ABCA5	ATP-binding cassette, sub-family A (ABC1), member 5	17q24.3	23461	6.03392	6.66587	0.631954	2.26371	0.031757	0.999994	up HIST1 1 vs. 0
SKAP1	src kinase associated phosphoprotein 1	17q21.32	8631	5.35504	5.97657	0.621531	2.3159	0.02832	0.999994	up HIST1 1 vs. 0
AK1	adenylate kinase 1	9q34.1	203	6.38105	7.00046	0.619405	2.72704	0.0110414	0.999994	up HIST1 1 vs. 0
MICALL2	MICAL-like 2	7p22.3	79778	7.13378	7.75233	0.618557	3.59288	0.00127256	0.999994	up HIST1 1 vs. 0
PADI2	peptidyl arginine deiminase, type II	1p36.13	11240	5.63564	6.24361	0.60797	2.17602	0.0383892	0.999994	up HIST1 1 vs. 0
TGFB1I1	transforming growth factor beta 1 induced transcript 1	16p11.2	7041	4.59625	5.203	0.606747	2.55486	0.0165144	0.999994	up HIST1 1 vs. 0
CCDC144C	coiled-coil domain containing 144C	17p11.2	348254	4.60652	5.21019	0.603675	2.33696	0.0270316	0.999994	up HIST1 1 vs. 0
TSPYL5	TSPY-like 5	8q22.1	85453	4.54345	5.1433	0.59985	2.33173	0.0273467	0.999994	up HIST1 1 vs. 0
GPATCH2	G patch domain containing 2	1q41	55105	7.04424	7.64277	0.598525	2.22014	0.0349111	0.999994	up HIST1 1 vs. 0
BTLA	B and T lymphocyte associated	3q13.2	151888	4.53359	5.12968	0.596088	2.46514	0.0202774	0.999994	up HIST1 1 vs. 0
CACNG4	calcium channel, voltage-dependent, gamma subunit 4	17q24	27092	7.21764	7.81326	0.595615	3.10185	0.00444045	0.999994	up HIST1 1 vs. 0
BCL3	B-cell CLL/lymphoma 3	19q13.1-q13.2	602	7.69565	8.28438	0.588732	2.13774	0.0416562	0.999994	up HIST1 1 vs. 0
HIST1H2AE	histone cluster 1, H2ae	6p22.1	3012	9.11854	7.36185	-1.75669	-2.84725	0.00828404	0.999994	down HIST1 1 vs. 0
HIST1H2BG	histone cluster 1, H2bg	6p21.3	8339	9.14206	7.53494	-1.60712	-2.34529	0.026537	0.999994	down HIST1 1 vs. 0
TRPS1	trichorhinophalangeal syndrome I	8q24.12	7227	5.70886	4.54683	-1.16203	-2.87987	0.00765651	0.999994	down HIST1 1 vs. 0
HIST1H1D	histone cluster 1, H1d	6p21.3	3007	7.90247	6.75653	-1.14594	-3.11815	0.00426394	0.999994	down HIST1 1 vs. 0
RXFP1	relaxin/insulin-like family peptide receptor 1	4q32.1	59350	4.83618	3.79586	-1.04032	-2.29639	0.0295633	0.999994	down HIST1 1 vs. 0
TCTEX1D1	Tctex1 domain containing 1	1p31.3	200132	4.73652	3.74593	-0.990596	-2.36534	0.0253797	0.999994	down HIST1 1 vs. 0
ASB9	ankyrin repeat and SOCS box containing 9	---	140462	4.80216	3.95528	-0.846878	-2.36423	0.0254426	0.999994	down HIST1 1 vs. 0
NPW	neuropeptide W	16p13.3	283869	5.60807	4.77528	-0.832794	-2.27391	0.0310572	0.999994	down HIST1 1 vs. 0
EGR3	early growth response 3	8p23-p21	1960	6.48457	5.65279	-0.831782	-2.57673	0.0157008	0.999994	down HIST1 1 vs. 0
HIST1H3F	histone cluster 1, H3f	6p22.2	8968	5.36796	4.54517	-0.822788	-2.4075	0.0230955	0.999994	down HIST1 1 vs. 0
HIST2H4B	histone cluster 2, H4b	1q21	554313	7.76838	6.95792	-0.810458	-2.41359	0.0227817	0.999994	down HIST1 1 vs. 0
FABP5	fatty acid binding protein 5 (psoriasis-associated)	8q21.13	2171	10.1647	9.37546	-0.78921	-2.83093	0.00861604	0.999994	down HIST1 1 vs. 0
LOC100506851	uncharacterized LOC100506851	---	100506851	4.80904	4.10621	-0.702825	-2.50225	0.0186341	0.999994	down HIST1 1 vs. 0
FZD5	frizzled family receptor 5	2q33.3	7855	5.52006	4.82865	-0.691412	-2.99378	0.00579959	0.999994	down HIST1 1 vs. 0
BEND4	BEN domain containing 4	4p13	389206	4.0703	3.38228	-0.68802	-2.3707	0.0250786	0.999994	down HIST1 1 vs. 0
PPIL2	peptidylprolyl isomerase (cyclophilin)-like 2	22q11.21	23759	6.54302	5.86111	-0.681913	-2.64346	0.0134427	0.999994	down HIST1 1 vs. 0
FAM118A	family with sequence similarity 118, member A	22q13	55007	6.24497	5.57237	-0.672601	-2.12851	0.0424801	0.999994	down HIST1 1 vs. 0
PRPS2	phosphoribosyl pyrophosphate synthetase 2	Xp22.3-p22.2	5634	7.49153	6.83491	-0.656621	-2.16495	0.0393097	0.999994	down HIST1 1 vs. 0
STRN3	striatin, calmodulin binding protein 3	14q13-q21	29966	7.0808	6.44561	-0.635192	-2.52657	0.0176244	0.999994	down HIST1 1 vs. 0
GPT2	glutamic pyruvate transaminase (alanine aminotransferase) 2	16q12.1	84706	6.61008	5.99519	-0.614885	-2.333	0.0272697	0.999994	down HIST1 1 vs. 0
LOC284926	uncharacterized LOC284926	22q13.31	284926	5.51161	4.91549	-0.596125	-2.15946	0.0397729	0.999994	down HIST1 1 vs. 0
CBX2	chromobox homolog 2	17q25.3	84733	6.45642	5.86285	-0.59357	-2.40594	0.023177	0.999994	down HIST1 1 vs. 0
C18orf1	chromosome 18 open reading frame 1	18p11.21	753	6.21308	5.62285	-0.590224	-2.62896	0.0139061	0.999994	down HIST1 1 vs. 0
